# Supplementary material for: Detection of Respiratory Viruses in Deceased Persons, Spain, 2017
Source: PubMed Central journal article supplement (PMC6038767; doi:10.3201/eid2407.180162), 2018-07
Supplement: 18-0162-Techapp-s1.pdf [file 18-0162-Techapp-s1.pdf]

# Detection of Respiratory Viruses in Deceased Persons, Spain, 2017

## Technical Appendix

### Viral Culture of the Influenza-Positive Samples

Samples that tested positive for influenza were tested in shell vial MDCK cell culture. Cell culture for influenza virus was successful in 2 of the 10 RT-PCR positive samples. The detection of influenza virus was poor in the cell culture, which may be attributable to the time since the infection or to the decline in viral viability postmortem.

**Technical Appendix Table 1.** Characteristics of the participants and nonparticipants in the study of postmortem diagnosis of respiratory virus, Spain, 2017.

| Characteristic           | Participants<br>N = 57 | Nonparticipants*<br>N = 49 | p value† |
|--------------------------|------------------------|----------------------------|----------|
| Date of death, 2017      |                        |                            | 0.789    |
| Week 4                   | 14                     | 16                         |          |
| Week 5                   | 15                     | 10                         |          |
| Week 6                   | 14                     | 12                         |          |
| Week 7                   | 14                     | 11                         |          |
| Women                    | 29 (51%)               | 23 (47%)                   | 0.702    |
| Nursing home residence   | 5 (9%)                 | 3 (6%)                     | 0.723    |
| Age ≥85 y                | 34 (60%)               | 26 (53%)                   | 0.558    |
| Previous hospitalization | 12 (21%)               | 12 (24%)                   | 0.817    |

\*Nonparticipants were persons who were not enrolled because of diverse circumstances: more than 24 h since the death, legal issues, logistic problems, a trained professional not available, close relative not available before preparing the dead body, and lack of signed consent.

†Two-tailed Fisher exact test was used to compare proportions.

**Technical Appendix Table 2.** Threshold cycle values and cell culture in samples with positive result for influenza virus by reverse transcription PCR, Spain, 2017

| Participant no. | Influenza type | Subtype | Threshold cycle (Ct) |               | Premortem test result for influenza |
|-----------------|----------------|---------|----------------------|---------------|-------------------------------------|
|                 |                |         | value                | Cell culture* |                                     |
| 1               | A              | AH3     | 30                   | Negative      | Not available                       |
| 2               | A              | AH3     | 31                   | Negative      | Positive                            |
| 3               | A              | AH3     | 30.65                | Negative      | Positive                            |
| 4               | A              | AH3     | 32                   | Negative      | Not available                       |
| 5               | A              | AH3     | 33                   | Negative      | Not available                       |
| 6               | A              | AH3     | 25                   | Negative      | Not available                       |
| 7               | A              | AH3     | 19.96                | Positive      | Not available                       |
| 8               | A              | AH3     | 29                   | Positive      | Not available                       |
| 9               | A              | AH3     | 23.87                | Negative      | Not available                       |
| 10              | A              | AH3     | 35                   | Negative      | Not available                       |

\*Evaluated by indirect immunofluorescence.

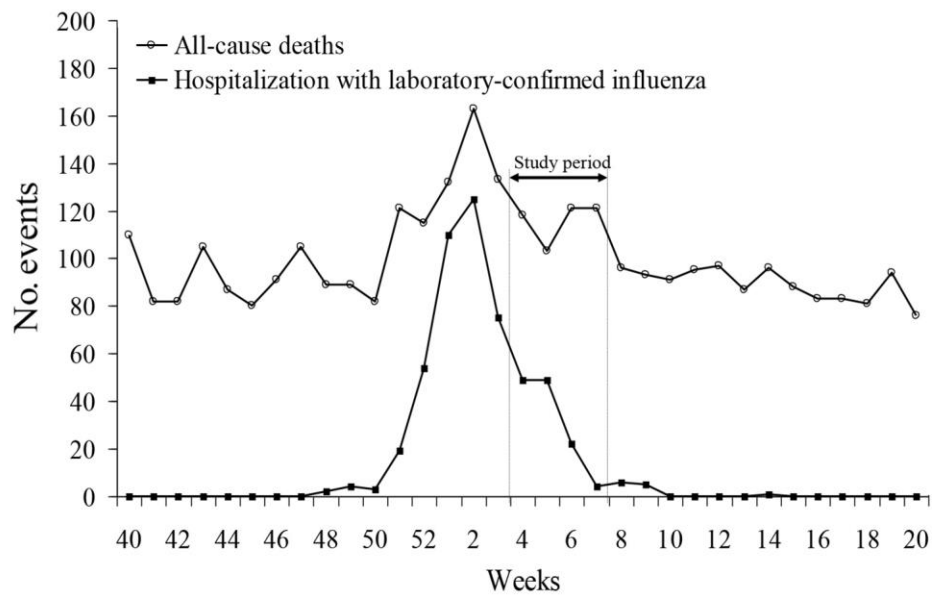

**Technical Appendix Figure.** Weekly incidence of hospitalized cases with laboratory confirmed influenza and all-cause deaths in persons  $\geq 65$  years of age in Navarre, Spain, during the 2016–17 influenza season. Study period was during weeks 4–7, 2017.
